# Supplementary material
Source: PubMed Central journal article supplement (PMC8277439)
Supplement: 10-1055-a-1351-1038-sup_pme1106.pdf [file 10-1055-a-1351-1038-sup_pme1106.pdf]

## Supplementary material

### **BNO 1095, a Standardized Dry Extract from the Fruits of *Vitex agnus-castus*, Impairs Angiogenesis-related Endothelial Cell Functions *In Vitro***

**Iris Bischoff-Kont<sup>1</sup>, Laura Brabenec<sup>1</sup>, Rebecca Ingelfinger<sup>1,2</sup>, Bernhard Nausch<sup>3</sup>, Robert Fürst<sup>1,2</sup>**

#### **Affiliation**

<sup>1</sup> Institute of Pharmaceutical Biology, Goethe University Frankfurt/Main, Germany

<sup>2</sup> LOEWE Center Translational Biodiversity Genomics (TBG), Frankfurt/Main, Germany

<sup>3</sup> Bionorica SE, Neumarkt, Germany

#### **Correspondence**

***Dr. Iris Bischoff-Kont***

Institute of Pharmaceutical Biology

Goethe University Frankfurt

Max-von-Laue-Str. 9

60438 Frankfurt am Main

Phone: +49 69 798 29645

Fax: +49 69 798 29662

i.bischoff@em.uni-frankfurt.de

## Supporting Information

A HPLC fingerprint of UV absorbance measurement at 205 nm of BNO 1095 (lot number 770134) was performed.

**Fig. 1S.** HPLC fingerprint (UV absorbance at 205 nm) of BNO 1095 (lot number 770134) after baseline correction [1].

### Supporting Figure 1S

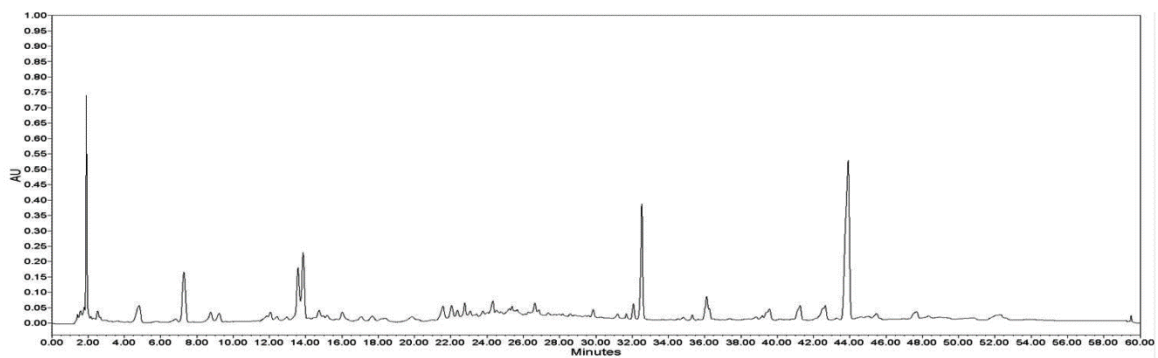

## Reference

1. Nausch B, Pace S, Pein H, Koeberle A, Rossi A, Künstle G, Werz O. The standardized herbal combination BNO 2103 contained in Canephron((R)) N alleviates inflammatory pain in experimental cystitis and prostatitis. *Phytomedicine* 2019; 60: 152987
